# Supplementary material for: Exploring Microemulsion Systems for the Incorporation of Glucocorticoids into Bacterial Cellulose: A Novel Approach for Anti-Inflammatory Wound Dressings
Source: MDPI journal article supplement (doi:10.3390/pharmaceutics16040504), 2024-04-07
Supplement: s1 [file s1]

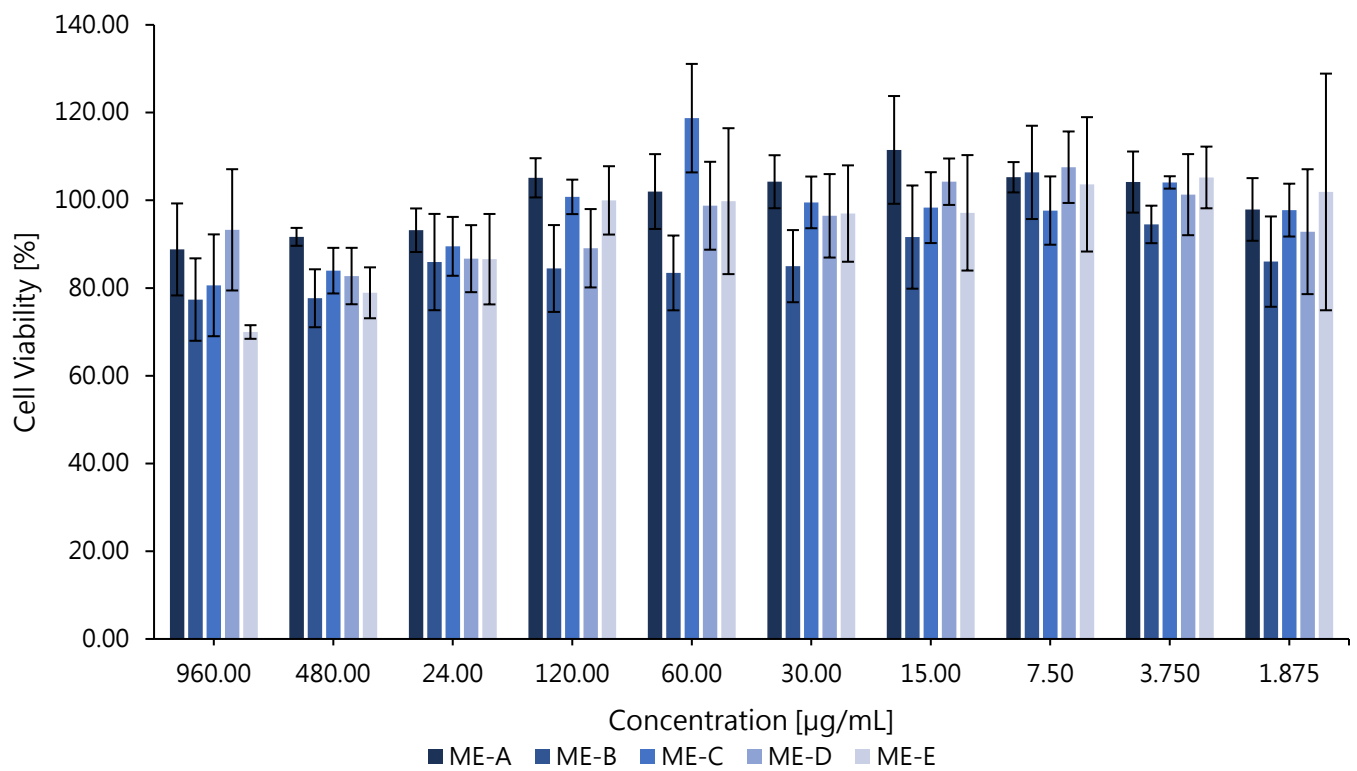

**Figure S1.** Mean cell viability of microemulsion (ME) samples without glucocorticoids in MTT (3-(4,5-dimethylthiazol-2-yl)-2,5-diphenyltetrazolium bromide) assay as percentage of untreated control cells. Human keratinocyte (HaCaT) cells were treated for 24 h with ME with concentrations ranging from 1.875 µg/mL to 960 µg/mL. Samples were prepared in quadruplicates and the test was accomplished thrice. Data are shown as mean  $\pm$  SD.

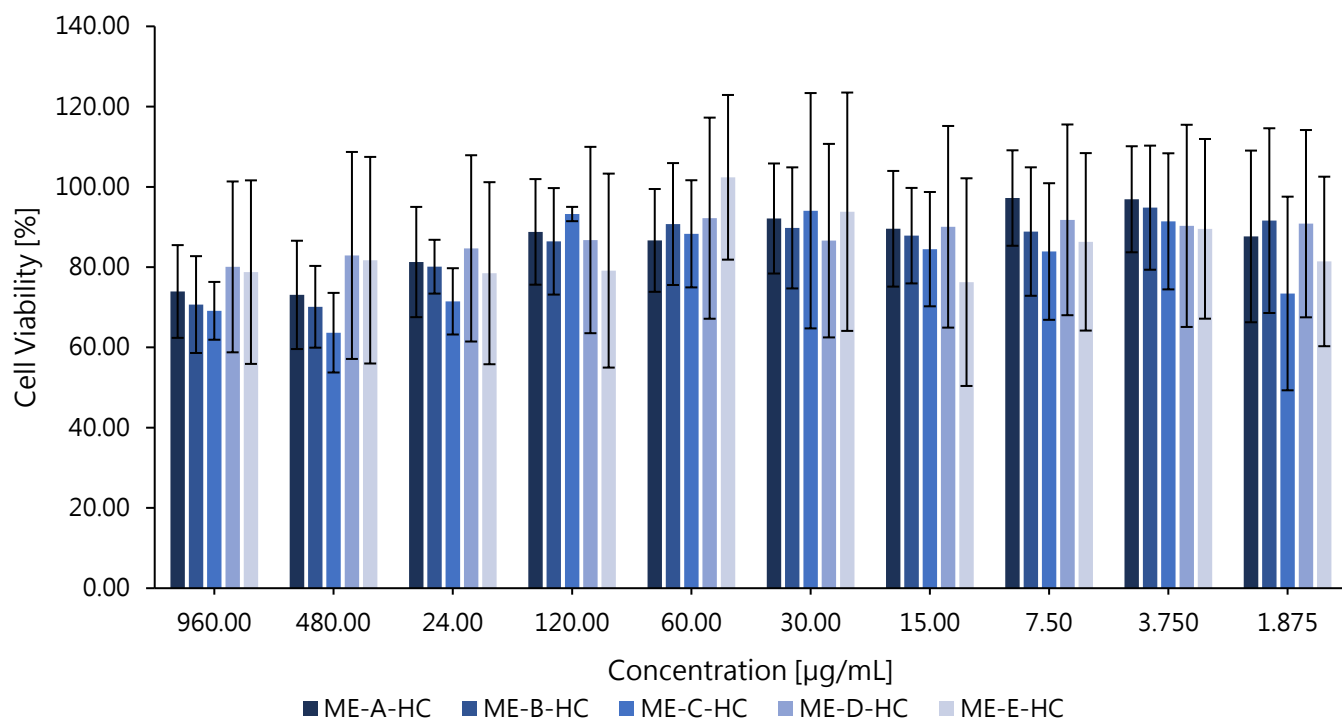

**Figure S2.** Mean cell viability of hydrocortisone loaded ME samples in MTT assay as percentage of untreated control cells. HaCaT cells were treated for 24 h with ME with concentrations ranging from 1.875 µg/mL to 960 µg/mL. Samples were prepared in quadruplicates and the test was accomplished thrice. Data are shown as mean  $\pm$  SD.

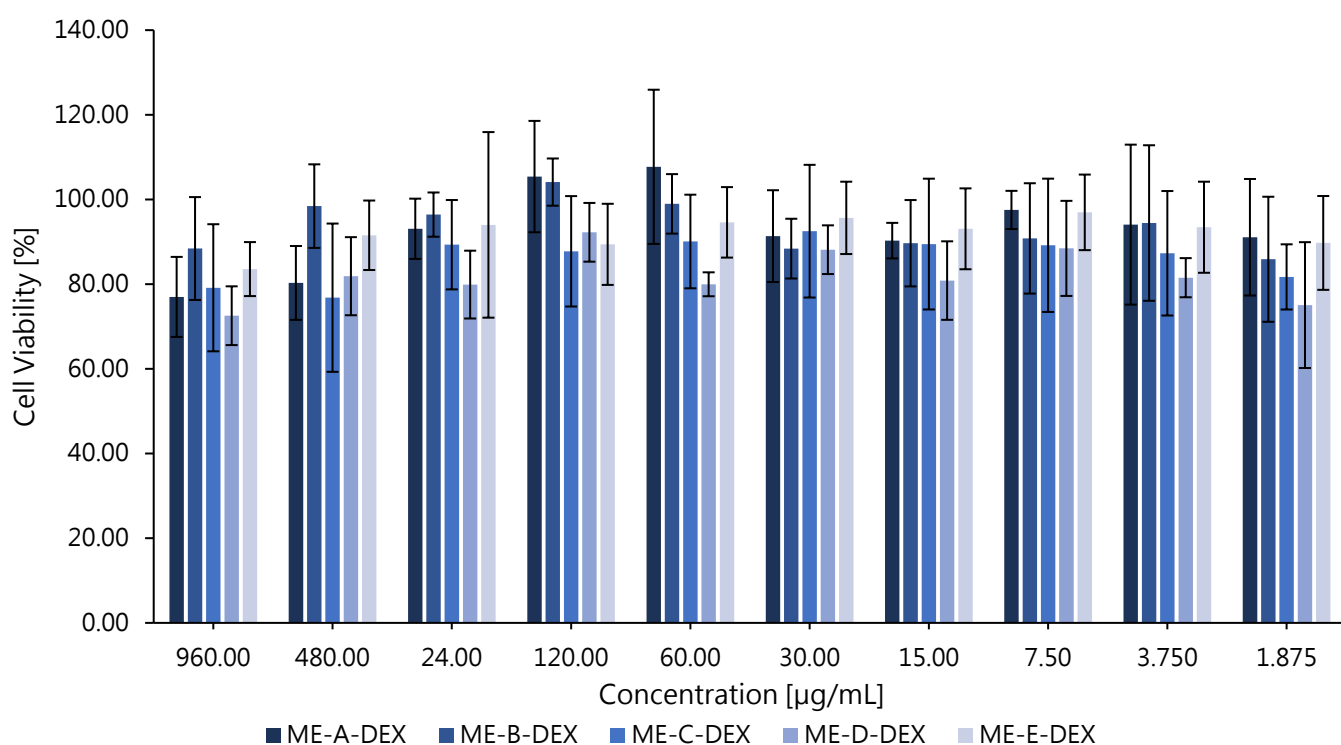

**Figure S3.** Mean cell viability of dexamethasone loaded ME samples in MTT assay as percentage of untreated control cells. HaCaT cells were treated for 24 h with ME with concentrations ranging from 1.875 µg/mL to 960 µg/mL. Samples were prepared in quadruplicates and the test was accomplished thrice. Data are shown as mean ± SD.

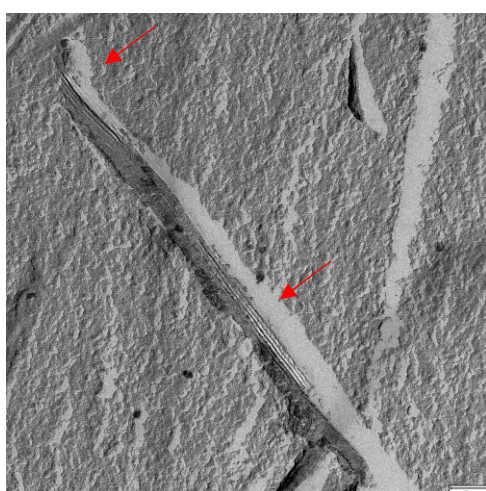

(a)

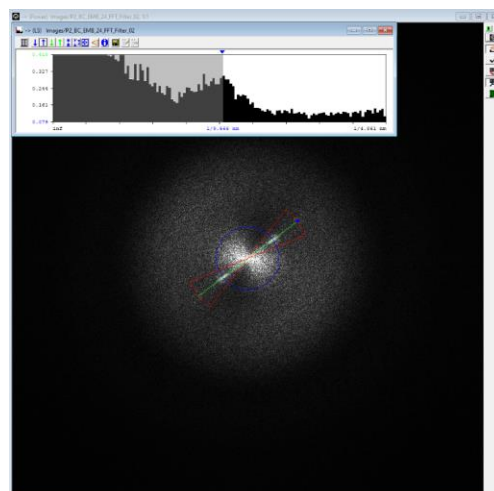

(b)

**Figure S4.** (a) Fast fourier transform (FFT) filtered freeze-fracture transmission electron microscopy (FF-TEM) image of regular structures at the fracture surface due to layered assembly of cellulose protofibrils. (b) Measurement of repetition distance in FFT image.
